# Supplementary material for: TGFBI functions similar to periostin but is uniquely dispensable during cardiac injury
Source: PubMed Central journal article supplement (PMC5531541; doi:10.1371/journal.pone.0181945), 2017-07-27

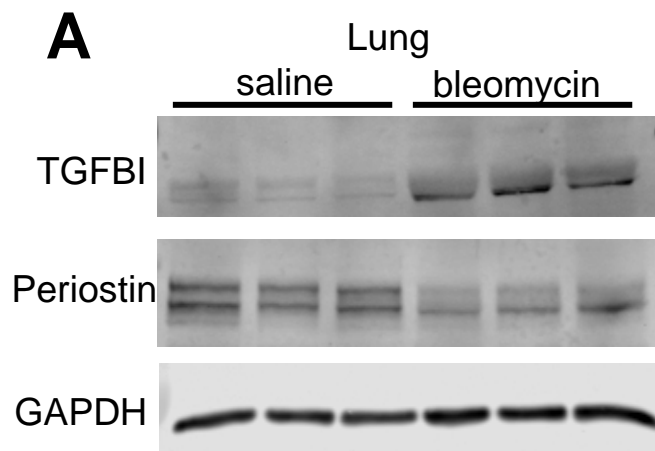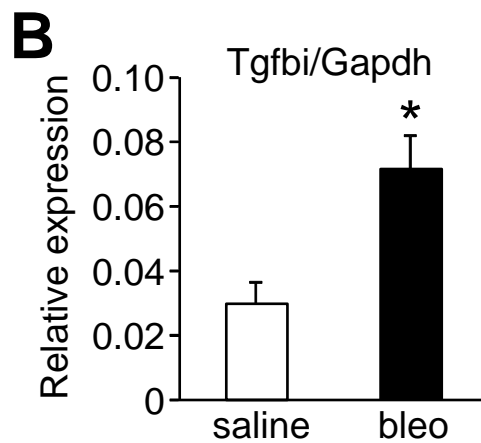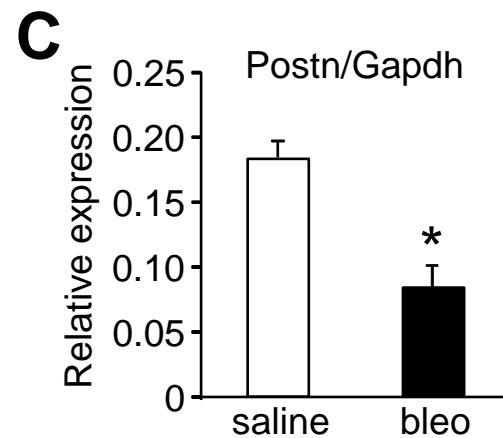

Supplement: pone.0181945.s002.pdf [file pone.0181945.s002.pdf]
